# Supplementary material for: Quantifying Catch Rates, Shark Abundance and Depredation Rate at a Spearfishing Competition on the Great Barrier Reef, Australia
Source: Biology (Basel). 2022 Oct 18;11(10):1524. doi: 10.3390/biology11101524 (PMC9598298; doi:10.3390/biology11101524)
Supplement: Supplementary file 1 [file biology-11-01524-s001.zip › biology-1903819-Supplementary-Materials.pdf]

**Table S1.** Table version of the statistical test.

| Independent variable                      | Dependent variable                        | Statistical test    | Check for assumptions                                                                                                                                                                                                                                                              |
|-------------------------------------------|-------------------------------------------|---------------------|------------------------------------------------------------------------------------------------------------------------------------------------------------------------------------------------------------------------------------------------------------------------------------|
| Time (competition day)                    | SPUE (number of sharks observed per hour) | Student's t-test    | Shapiro-Wilk normality test<br>W = 0.887, p-value = 0.04995<br>Levene's Test for Homogeneity of Variance (center = median)<br>Df = 1, F value = 0.0256 Pr(>F) group = 0.8752                                                                                                       |
| Location (refer to Figure 1)              | SPUE (number of sharks observed per hour) |                     | Shapiro-Wilk normality test<br>W = 0.96277, p-value = 0.7123<br>Levene's Test for Homogeneity of Variance (center = median)<br>Df = 6, F value = 0.05085 Pr(>F) group = 0.7883                                                                                                     |
| Time (competition day)                    | CPUE (fish catch per hour)                | Mann-Whitney test   | Shapiro-Wilk normality test<br>W = 0.86958, p-value = 0.02679<br>Levene's Test for Homogeneity of Variance (center = median)<br>Df = 1, F value = 0.0759 Pr(>F) group = 0.787<br>Mann-Whitney U-test<br>W = 25, p-value = 0.5251                                                   |
| Location (refer to Figure 1)              | CPUE (fish catch per hour)                | Kruskal-Wallis      | Shapiro-Wilk normality test<br>W = 0.86958, p-value = 0.02679<br>Levene's Test for Homogeneity of Variance (center = median)<br>Df = 6, F value = 3.1744 Pr(>F) group = 0.05864<br>Kruskal-Wallis rank sum test<br>Kruskal-Wallis chi-squared = 8.987, df = 6, p-value = 0.1743    |
| Shark species                             | SPUE (number of sharks observed per hour) | Kruskal-Wallis      | Shapiro-Wilk normality test<br>W = 0.46709, p-value < 2.2e-16<br>Levene's Test for Homogeneity of Variance (center = median)<br>Df = 8, F value = 12.02 Pr(>F) group = 7.335e-13<br>Kruskal-Wallis rank sum test<br>Kruskal-Wallis chi-squared = 64.879, df = 8, p-value = 5.1e-11 |
| Depth                                     | SPUE (number of sharks observed per hour) | Regression analysis | y = 0.0381x + 2.1291<br>R <sup>2</sup> = 0.0323                                                                                                                                                                                                                                    |
| SPUE (number of sharks observed per hour) | CPUE (fish catch per hour)                | Regression analysis | y = 0.1437x + 0.8541<br>R <sup>2</sup> = 0.0681                                                                                                                                                                                                                                    |
| SPUE (number of sharks observed per hour) | Depredation rate                          | Regression analysis | y = 0.017x + 0.015<br>R <sup>2</sup> = 0.1018                                                                                                                                                                                                                                      |

|                              |                                           |                    |                                                                                                                                                                                                                |
|------------------------------|-------------------------------------------|--------------------|----------------------------------------------------------------------------------------------------------------------------------------------------------------------------------------------------------------|
| Time (competition day)       | Depredation rate                          | Mann-Whitney test  | Shapiro-Wilk normality test<br>W = 0.64463, p-value = 4.408e-05                                                                                                                                                |
|                              |                                           |                    | Levene's Test for Homogeneity of Variance (center = median)<br>Df = 1, F value = 0.0451 Pr(>F) group = 0.8348<br>Mann-Whitney U-test<br>W = 36, p-value = 0.6263                                               |
| Location (refer to Figure 1) | Depredation rate                          | Kruskal-Wallis     | Shapiro-Wilk normality test<br>W = 0.64463, p-value = 4.408e-05                                                                                                                                                |
|                              |                                           |                    | Levene's Test for Homogeneity of Variance (center = median)<br>Df = 6, F value = 0.6961 Pr(>F) group = 0.6601<br>Kruskal-Wallis rank sum test<br>Kruskal-Wallis chi-squared = 7.3996, df = 6, p-value = 0.2855 |
| Location (days pooled)       | SPUE (number of sharks observed per hour) | PERMANOVA and nMDS |                                                                                                                                                                                                                |
